26 should the investigator compress the information without sacrificing too much? There are arbitrary choices  
27 that have to be made, but there are some definite thresholds under which loss of information is too great for  
28 optimal utility.

29 For example, in a typical statistical analysis, two quantitative results are produced for each effect of interest:  
30 the estimation for the amplitude of the effect itself (e.g., a  $\beta$  value from regression analysis or GLM) and the  
31 associated statistic (e.g.,  $t$  or  $z$ ). The former provides the magnitude of a physical measurement, which is  
32 the essence of scientific investigation, while the latter offers statistical substantiation for the effect estimate in  
33 the form of a significance level (or confidence interval, the implied range that may contain the effect estimate  
34 with a certain likelihood). While the relationship between the two quantities is tight, each conveys distinct  
35 information about the result of the experiment; in most scientific disciplines, it is considered unacceptable if  
36 only significance is reported (Sullivan and Feinn, 2012): the statistic value serves as auxiliary evidence for the  
37 existence of the targeted effect, and it is the effect estimate itself that is the center of investigation as the  
38 physical property of interest. For example, suppose that physicists would like to validate the predictions of  
39 the general relativity (Einstein, 1915) by investigating the gravitational waves from the merger of two black  
40 holes. It would be hard to imagine that they would only report a statistical value or the significance of their  
41 measurement (e.g., a chance of 1 event per 203,000 years, or a significance level of  $3.4 \times 10^{-7}$ ), but that they  
42 would not reveal the strength of the signal they have detected (a peak gravitational-wave strain of  $1.0 \times 10^{-21}$   
43 in the frequency range of 35 to 250 Hz) (Abbott et al., 2016).

44 However, within the field of neuroimaging, it has remained the predominantly common practice to report  
45 only statistical mapping tests in publications and presentations, a custom which has been largely (and per-  
46 plexingly) immune to critical scrutiny. For instance, one typically sees brain results provided as blobs whose  
47 color spectrum corresponds to  $t$ - or  $z$ -values (or occasionally to  $p$ -values), and most of the time the underlying  
48 degrees of freedom are left out, rendering the statistics even harder to interpret. Similarly, in tabulated results  
49 for brain regions, standard reports usually contain the coordinates and statistic value at a single peak voxel  
50 (which is itself defined, again, as the maximum of the statistical values, not of the effect estimates, within  
51 the region), and the effect estimate at such a peak voxel is rarely reported. The same phenomenon commonly  
52 occurs in reporting results of seed-based correlation analyses for resting-state data, where the brain maps and  
53 tables usually show the statistic (often  $z$ ) values instead of and without including inter-regional correlations.

54 Recently there have been a number of discussions about the use and misuse of  $p$ -values in the scientific  
55 community (e.g., Wasserstein and Lazar, 2016; Nuzzo, 2014), and others have been more critical of the “cult” or  
56 “obsession” of statistical significance (e.g., Ziliak and McCloskey, 2009). The editors of the journal, *Basic and*  
57 *Applied Social Psychology*, have gone so far as to take the seemingly extreme step as to no longer accept papers  
58 with  $p$ -values due to the concern of the statistics being used to support lower-quality research (Trafimow, 2014).  
59 In a sense, our concern here is related, and addressing it would also alleviate many of these other topical issues,  
60 but the issue is specifically focused on the need for including the effect estimate in neuroimaging studies. To

61 frame the discussion here, we quote the six guiding principles on  $p$ -values in a recent statement released by The  
62 American Statistical Association (ASA) (Wasserstein and Lazar, 2016):

- 63 1.  $P$ -values can indicate how incompatible the data are with a specified statistical model.
- 64 2.  $P$ -values do not measure the probability that the studied hypothesis is true, or the probability that  
65 the data were produced by random chance alone.
- 66 3. Scientific conclusions and business or policy decisions should not be based only on whether a  $p$ -value  
67 passes a specific threshold.
- 68 4. Proper inference requires full reporting and transparency.
- 69 5. A  $p$ -value, or statistical significance, does not measure the size of an effect or the importance of a  
70 result.
- 71 6. By itself, a  $p$ -value does not provide a good measure of evidence regarding a model or hypothesis.

72 We believe that the neuroimaging field needs to move forward to promote the reportage of the effect estimates  
73 along with the corresponding statistics. We first discuss the statistical terms in the context of fMRI analyses,  
74 highlighting specific features related to that field. We then argue that full reporting in fMRI is necessary and  
75 promotes good scientific practice, clarity, increased reproducibility, cross-study comparability and allows for  
76 proper meta and power analyses. Finally, we provide several recommendations for researchers and software  
77 designers to facilitate these “best practices” actions.

## 78 **What is the effect estimate in neuroimaging?**

79 In neuroimaging, the ultimate focus is on the physical evidence for the brain’s neuronal response, which  
80 evidence is typically embodied in the strength of the fMRI BOLD signal. For task-related experiments, the  
81 response strength is reflected in the effect estimate (or  $\beta$  value) associated with a task/condition or with a linear  
82 combination of  $\beta$ ’s from multiple tasks, such as the contrast between two tasks. For seed-based correlation  
83 analyses with resting-state data, time series correlation captures the relationship between a seed and the rest of  
84 the brain. Similarly, for naturalistic scanning, one measure is the “inter-subject correlation” (ISC) at a region  
85 that features the synchronization or similarity among subjects (Hasson et al., 2004). Here, we use the term  
86 “effect estimate” to refer generally to any of these or analogous cases: the estimated response magnitude (e.g.,  $\beta$   
87 value) of a regression model or GLM, the estimated correlation coefficient in the context of correlation analyses,  
88 etc.

89 We note that in the statistical literature, the phrase “effect size” can typically encompass two distinct  
90 scenarios: one for describing absolute effect size (the estimated magnitude of an effect under investigation,  
91 e.g., sample mean or the estimated  $\beta$  in a regression model), and the other for describing standardized effect

92 magnitude (e.g., Cohen’s  $d$ ), which is typically used when the measurement units have no intrinsic meaning  
93 (e.g., Likert-type scale adopted in survey research), when a comparison is performed between two different scales  
94 (e.g., relative effect sizes among different confounders such as age and sex), or when data variability is the focus  
95 of study (Sullivan and Feinn, 2012). While it is well known that the acquired BOLD signal has only arbitrary  
96 units, therefore it might seem that the second usage of effect size is a good candidate. However, FMRI data  
97 are commonly scaled to a more meaningful evaluation in terms of percent signal change (as discussed further  
98 below). As such, here we use the term “effect estimate” in FMRI to refer to the unit-bearing case of “effect  
99 sizes” in the context of percent signal change.

## 100 **What does a $t$ -statistic value reveal in neuroimaging?**

101 A  $t$ -statistic value for an effect estimate is calculated as the latter divided by its standard error, which  
102 represents the reliability or accuracy of the effect estimate. Thus, the  $t$ -statistic is a mixture of the effect  
103 estimate and the noise estimate, and there is little reason to think that the noise estimate is directly relevant  
104 to neuroscience. As a dimensionless measure, the  $t$ -statistic is more susceptible to sample size (number of  
105 trials or subjects), signal-to-noise ratio (SNR), preprocessing steps/methods, experimental designs, unexplained  
106 confounds, and scanner parameters than the effect estimate itself. Therefore, statistic values only serve the  
107 purpose of a binary inference of null (e.g., there is no difference between the two conditions) versus alternative  
108 (e.g., there is difference between the two conditions) hypotheses, and it does not provide any information about  
109 the specific response magnitude. For example, two voxels (or regions) with the same  $t$ -statistic value in the  
110 brain do not mean the same response amplitude, and *vice versa* (Fig. 1). That is to say, the  $t$ -statistic does  
111 not carry enough interpretation information for the effect of interest.

## 112 **Practical realities/difficulties of FMRI**

113 There are several features inherent to FMRI acquisition and analysis that present challenges to an investiga-  
114 tor interpreting and reporting results. At first glance, some of these may seem to explain the present practices  
115 of reporting only statistic values as results. We describe them briefly here, and then discuss how they actually  
116 necessitate, rather than discourage, the inclusion of effect estimates in the end.

### 117 **Units and scaling**

118 As noted above, one complication of the FMRI signal is that the numerical value from the scanner does  
119 not have any specific physical meaning and is essentially arbitrary. As a consequence, the signal value may  
120 vary across brain regions, sessions, days, subjects, studies, and scanners. To deal with this arbitrariness, a  
121 normalization step is typically adopted by researchers by scaling the signal so that the relative magnitude of  
122 the BOLD response is comparable between different contexts. For example, by default in AFNI (Cox, 1996)

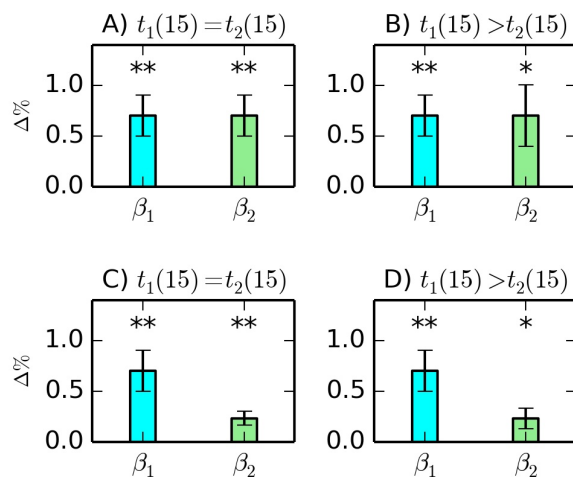

Figure 1: A statistic value alone does not reveal the relative magnitude for an effect of interest. Specifically, two identical  $t$ -values (here, with 15 degrees of freedom) may have similar (A) or dramatically different (C) effect estimates. On the other hand, two different  $t$ -statistic values may have the same (or opposite) sequence as (or to) that of the corresponding effect estimates; for instance, a larger  $t$ -value could correspond to a larger effect estimate if the standard error is roughly proportional to the effect estimate (D) or similar or even smaller effect estimate if the standard error is smaller (B). The numbers inside the parentheses are the degrees of freedom for the  $t$ -statistic, and asterisks indicate orders of magnitude in  $p$ -values: \*  $0.01 \leq p < 0.05$ ; \*\*  $p < 0.01$ . Effects are scaled units of percent signal change.

123 the time series is scaled by the mean value at each voxel, so that the effect estimate can be directly interpreted  
 124 as a percent signal change relative to the voxel-wise temporal mean; as a result, effect estimates themselves  
 125 are interpretable, carry real information about the size of the BOLD effect, and are comparable across brain  
 126 regions, conditions, subjects, groups, studies and scanners<sup>1</sup>.

127 One may argue that the voxel-wise baseline, instead of the mean, is a more accurate candidate to serve  
 128 as the scaling factor. However, in FMRI the drift effect (or the presence of low frequency components due to  
 129 scanner drift, shim effects) embedded in the signal complicates the isolation of the “real” baseline value. In  
 130 practice, the fluctuations due to the task effect are very small relative to the absolute values of the signal (e.g.,  
 131 most task effects are around 1% or less relative to the BOLD signal mean), leading to a negligible difference  
 132 when the voxel-wise mean, instead of the “true” but unknown baseline, is used in scaling<sup>2</sup>. Even if there are  
 133 different preferred mechanisms of scaling, it appears to be a truth universally acknowledged that the BOLD

<sup>1</sup>Similarly, “grand mean scaling” is typically performed in FSL (<http://fsl.fmrib.ox.ac.uk/fsl/fslwiki/>) and SPM (<http://www.fil.ion.ucl.ac.uk/spm/>), by dividing the signal by the average value across the brain as well as across time. The purpose of grand mean scaling is to bring the effect estimates to a similar range so that they are roughly comparable across brain regions, sessions, days, subjects, studies, and scanners. However, such a scaling method does not exactly lead to the interpretation of percent signal change because of spatial heterogeneity. A separate toolbox MarsBaR (Brett et al., 2002) is often used to convert the effect estimates into percentage at the regional level.

<sup>2</sup>The negligible effect of replacing the true “baseline” value by the voxel-wise mean can be demonstrated by a back-of-the-envelope calculation. Suppose that the signal intensity at a voxel has a mean value of 2400 for the time series (after slow drift effects are removed), peak intensity corresponding to a task is 2410, and a “real baseline” value is 2390. The scaled peak value at the voxel by the mean is  $100 \times 2410/2400 \approx 100.417$ , and the scaled baseline value of  $100 \times 2390/2400 = 99.583$ . The percent signal change for the task relative to the baseline is thus estimated as  $(100.417 - 99.583)/100 \approx 0.834\%$  in the regression model. Alternatively, if we analyze the data without scaling, the “true” percent signal change of the condition would be calculated as  $(2410 - 2390)/2390 \approx 0.837\%$ . The ratio of the difference between the two estimates relative to the true effect estimate is  $(0.837 - 0.834)/0.837 \approx 0.358\%$ .

134 signal can and should be calibrated through a normalization step, providing a meaningful and comparable  
135 measure. While there is not a single method for calibrating the effect estimate or signal change to a meaningful  
136 unit that is uniformly adopted by all researchers, such a difficulty should not be an excuse for not reporting  
137 the BOLD response.

## 138 **Modeling difficulties**

139 One aspect of fMRI data is that the hemodynamic response (HDR) is captured by a curve with a slow  
140 upstroke and a sluggish recovery; the curve may also contain an undershoot right after the stimulus onset or at  
141 the end of the recovery phase (D’Esposito et al., 1999). In addition to the overall amplitude, the response may  
142 vary across cognitive states, tasks, brain regions, and subjects with respect to response characteristics such as  
143 rise and fall speed, peak duration, undershoot shape, and overall duration. The nature of the HDR is still not  
144 fully understood due to the complicated and multifaceted biophysical processes involved.

145 As the underlying components comprising the BOLD signal are still poorly understood, the performance  
146 of the regression model at the individual subject level is often poor. For example, attenuations across trials  
147 or within each block are usually not considered; the impact of physiological (cardiac and breathing) effects is  
148 mostly lacking, though it is occasionally modeled (e.g., ANATICOR, Jo et al., 2010). Because of these factors,  
149 the variance due to poor modeling overwhelms all other sources (e.g., across trials, runs, and sessions) in the  
150 total data variances (Gonzalez-Castillo et al., 2016); that is, the majority (e.g., 60-80%) of the total variance  
151 in the data is not properly accounted for in statistical models. There are also strong indications that a large  
152 portion of BOLD activations are usually unidentified at the individual subject level due to the lack of power  
153 (Gonzalez-Castillo et al., 2012). The detection failure (false negative rate) at the group level would probably  
154 be equally high, if not higher. Due to the presence of large variability and unaccounted-for noise, low reliability  
155 leads to inaccurate estimation of the effect of interest.

156 Another modeling difficulty that arises when comparing effect estimates across studies is the dependence of  
157 the BOLD effect percent signal change on scanning parameters (e.g.,  $B_0$ , TE, slice thickness, etc.). The current  
158 state of modeling does not make combining/contrasting effect estimates from significantly different types of  
159 scans practicable. For this reason, it is important to clearly specify the MRI setup used.

## 160 **Limitations of statistical significance testing**

161 Under the methodology of null hypothesis significance testing (NHST), the statistic value is mainly used to  
162 determine the statistical significance level of an effect estimate so that false positive rate is controlled. Once the  
163 value surpasses the threshold, the specific value of the statistic is neither as informative nor as important as the  
164 response amplitude or effect estimate. The current misplaced focus on statistical significance when reporting a  
165 scientific result (Ziliak and McCloskey, 2009) is equally detrimental as shown by a popular statistical fallacy: If  
166 the result is not statistically significant, then it proves that no effect or difference exists. As the  $p$ -value under

167 a null hypothesis is a conditional probability, it cannot be stated that the probability of obtaining the data  
168 under the current study given the null is the same as that of the null given the data.

169 There is a clear difference between statistical significance and practical significance. The absence (or ig-  
170 norance) of a real effect estimate in results reporting has prompted the distinction between the two types of  
171 significance: substantive significance or practical significance in terms of effect magnitude and statistical signif-  
172 icance in terms of probability threshold (Gelman and Stern, 2006). For example, it was shown that “emotional  
173 contagion occurs without direct interaction between people (exposure to a friend expressing an emotion is suf-  
174 ficient), and in the complete absence of nonverbal cues” through Facebook (Kramer et al., 2013). However,  
175 it was later pointed out that the effect size measured by Cohen’s  $d = 0.02$  was so small that such a tiny dif-  
176 ference in emotional contagion is not practically meaningful. In other words, a trivial effect (a tiny difference  
177 between two groups or conditions, or a negligible correlation) can become statistically significant with enough  
178 sample size. For example, a drug effect in a clinical trial, even if statistically significant, may not offer much  
179 practical benefit when the effect is small (e.g., lowering cholesterol level by 2.7 mmol/L). Similar pitfalls have  
180 been seen in studies which “demonstrated” that beautiful parents have more daughters, and violent men have  
181 more sons (Gelman and Weakliem, 2009). Importantly, without presenting the effect estimate, not only would  
182 one be unable to gauge the false negative rate or power of the study, (i.e., the probability of failure or success,  
183 respectively, to detect the effect), but it would also be impossible to assess two other useful but less known  
184 errors (Gelman and Tuerlinckx, 2000): type M (tendency to over- or under-estimate the effect magnitude) and  
185 type S (likelihood of obtaining the incorrect directionality or sign of the effect).

186 Activation identification in fMRI data analysis heavily relies on contrasting between conditions; however,  
187 another subtlety is that the contrast between a significant effect and a nonsignificant one is not necessarily itself  
188 statistically significant. For example, suppose that, with 16 subjects (and 15 degrees of freedom), positive and  
189 negative conditions have effect estimates of 1.0 and 0.45 percent signal change, respectively, and both estimates  
190 have the same standard error of 0.3. Even though the positive condition is statistically significant ( $t(15) = 3.33$ ,  
191 two-tailed  $p = 0.0045$ ) and the negative condition is not ( $t(15) = 1.5$ , two-tailed  $p = 0.15$ ) at 0.05 level, their  
192 contrast could be statistically insignificant (e.g.,  $t(15) = 1.65$ , two-tailed  $p = 0.12$ ) (Fig. 2).

193 The classical statistical testing is consistent with the Popperian paradigm in which science advances through  
194 the proposition and refutation of hypotheses (Popper, 1963). However, the omnipresence of focus on statis-  
195 tic values alone, while ignoring the effect estimates, unavoidably encourages and facilitates a yes/no binary  
196 thinking, and has in fact led to the false interpretation that sub-threshold regions have no activation and that  
197 supra-threshold regions comprise the entire story (Gelman, 2013). In addition, the approach suffers from a “sta-  
198 tistical significance filter” (Gelman and Weakliem, 2009): results that reach a preset significance level inherently  
199 overestimate the effect and also tend to go in the wrong direction.



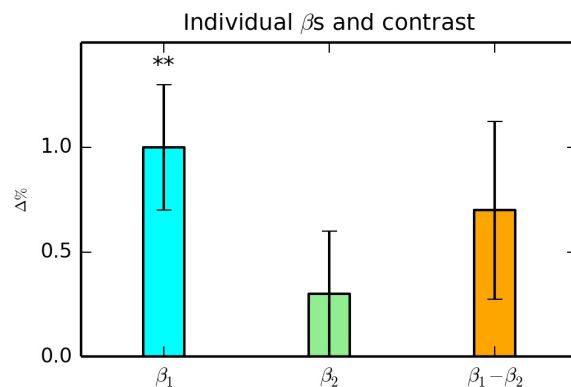

Figure 2: A statistically significant (blue) and insignificant (green) effect are shown both in scaled units of percent signal change. However, their difference might be practically significant but not statistically significant (yellow). Asterisks indicate orders of magnitude in  $p$ -values: \*  $0.01 \leq p < 0.05$ ; \*\*  $p < 0.01$ .

## 200 Why is it crucial to report effect estimates?

201 The effect estimate provides a piece of hard, quantitative evidence in an analysis, and it should be reported  
202 as the main finding of a modeled or measured effect (Sullivan and Feinn, 2012). The corresponding statistic or  
203  $p$  value usually indicates the reliability or accuracy of the effect estimate, but it cannot replace the information  
204 content of the effect estimate itself. For this reason, the importance of reporting the specific effect estimate under  
205 study has been repeatedly emphasized in various fields. For example, one recommendation from the American  
206 Psychiatric Association (Wilkinson et al., 1999) reads: “Always present effect sizes for primary outcomes...  
207 If the units of measurement are meaningful on a practical level (e.g., number of cigarettes smoked per day),  
208 then we usually prefer an unstandardized measure (regression coefficient or mean difference) to a standardized  
209 measure ( $r$  or  $d$ ).” We enumerate here specific examples and applications of this principle within the FMRI  
210 context.

## 211 Reproducibility

212 Reproducibility is critical for scientific investigations, and it can be quite challenging for FMRI studies, as  
213 the data typically have low SNR and low reliability for each effect estimate. One should not overemphasize  
214 the statistical thresholding and lose sight of the scientific context, particularly where the noise is usually much  
215 stronger than the signal in the data. In recent surveys, about 60% of published experiments failed to survive  
216 replication in psychology (Baker, 2015) and about 40% in economics (Bohannon, 2016), and the situation with  
217 neuroimaging is likely not much better (Griffanti et al., 2016).

218 In fact, the availability of the effect estimate in the literature becomes pivotal in cross-examining or repro-  
219 ducing the results across studies. Verification for regional activations based on statistical significance would  
220 partially serve the purpose, but reproducibility cannot be solely built on statistical values. The notion that  
221 statistical significance alone does not imply result replicability is nicely captured by Thompson (1999): “it



222 would be the abject height of irony if, out of devotion to replication, we continued to worship at the tabernacle  
223 of statistical significance testing, and at the same time we declined to (a) formulate our hypotheses by explicit  
224 consultation of the effect sizes reported in previous studies and (b) explicitly interpret our obtained effect sizes  
225 in relation to those reported in related previous inquiries.”

226 With both the effect estimate and its standard error (or reliability, which is embedded in the  $t$ -statistic value,  
227 for example) available, one can readily compare the effect estimates across conditions, regions, subjects, groups,  
228 studies, scanners, etc. For example, suppose that a previous study indicated an effect estimate of 0.73% signal  
229 change with a statistic value of  $t(16) = 4.12$  at a peak voxel (defined by the maximum effect estimate within a  
230 cluster). In such a case, a researcher would find that having an effect estimate of 0.65% with  $t(22) = 3.75$  in  
231 her own study would be compatible with the existing result, while an effect estimate of 0.1% with  $t(22) = 3.35$   
232 would unlikely be. Obviously such comparisons (or reproducibility) would be impossible if only statistic values  
233 are reported in the literature, as currently prevalent in neuroimaging.

234 Furthermore, one can also use effect estimate reporting to easily spot unrealistic results at a region, either in  
235 one’s own pre-published work or, an unfortunate practical necessity, in an existing research article. For example,  
236 a region might show up having more than 3% signal change while still exhibiting a reasonable statistical  
237 significance due to modeling issues, noise, etc. If only statistics were used for thresholding, coloring and  
238 reporting, then such an artifactual result would likely go undetected by either the authors or, later, other  
239 readers. Thus, viewing the effect estimates themselves provides an extra layer of safety against false positives,  
240 increasing reproducibility in reporting.

## 241 Clarity

242 It is a common practice in fMRI literature to present brain activation maps that are both thresholded and  
243 colored by statistic values. However, such presentations entirely ignore the effect estimates, and such coloration  
244 has been shown to lead to distorted impression of the results in recent surveys (Engel and Burton, 2013). If  
245 only the significance level of a correlation or BOLD response at a region is given, one would have no idea about  
246 the strength of the effect or the association, and thus the scientific relevance is missing. In other words, with  
247 the current practice of reporting statistic values alone, at best the results are ambiguous and at worst they are  
248 misleading.

249 To drive home the point that a statistic or  $p$  value is not the whole picture nor as informative as combining  
250 with the effect estimate, consider the following example. Suppose that at one region the effect estimate is  
251 0.03% signal change with  $p = 0.001$  while at another region the response is 0.94% with  $p = 0.053$ . Is the  
252 higher statistical significance with the first voxel more worthy of reporting than the second? On the surface,  
253 the response of 0.03% at the first region occurred with greater confidence while the second region failed to reach  
254 the arbitrarily designated significance level of 0.05. However, the response magnitude of 0.94% is quite a bit  
255 stronger and might be more neurologically relevant or important than the statistically significant response of

256 0.03%. Furthermore, the second region might have reached the nominal significance level with a larger number  
257 of subjects. Looking at this example without the effect estimates, one might easily misinterpret the results.

258 Directly relevant to the neuroimaging community is the moral from these examples: without the effect  
259 estimate, the sole focus on statistical significance often presents a distorted picture. Specifically, the power with  
260 neuroimaging data is typically low due to the the facts that large parts of the signal that cannot currently be  
261 accounted for and that there is large variability across subjects. The presence of many false negatives may lead  
262 to the illusion that a statistically insignificant effect is equivalent to a nonexistent effect, when in some cases  
263 there are not enough data to discern whether the effect is practically important. In other words, type M errors  
264 tend to increase, and a distorted interpretation may occur without the presence of effect estimates that may be  
265 assessed more accurately than the decontextualized statistic values.

## 266 **Validation of BOLD response detection power through effect estimates**

267 Although most research-oriented investigations place a heavily-lopsided emphasis on the false positive rate  
268 controllability, sensitivity (or power) may also be a primary focus under some circumstances, such as pre-surgical  
269 detection, where the efficiency is usually less than 10% (Button et al., 2013). Several particular factors may  
270 contribute to a cluster not being able to achieve the desired significance at the group level under a rigorous  
271 procedure.

- 272 a) To achieve the desired significance or power at the cluster level (or in the FDR sense), it is usually  
273 necessary to have a large number of subjects, which most studies lack due to financial and/or time  
274 costs.
- 275 b) Spatial alignment has multiple steps including cross-TR (“motion correction”), cross-session, cross-  
276 modality and cross-subject components, increasing the overall chance of misalignment. An erroneous  
277 or even suboptimal alignment procedure will surely impact the power performance at the group level.
- 278 c) The variation in response magnitude or SNR across regions, as well as the variation of the underlying  
279 region’s spatial extent, may also lead to different efficiency in activation detection across the brain.  
280 An intrinsically small response magnitude or small region, such as the amygdala, requires a smaller  
281 voxel-wise  $p$ -values to survive the family-wise error (FWE) or false discovery rate (FDR) correction  
282 compared to their larger counterparts, and this may not always be realistic to achieve in a study. The  
283 popular small volume correction (SVC) is offered as a band-aid solution, but is not always rigorous  
284 or valid, and may become problematic when other regions are of interest at the same time.
- 285 d) If a two-tailed test, when appropriate, is strictly performed instead of two separate one-tailed tests  
286 as typically practiced in the field, or if FWE/FDR correction is rigorously executed, many studies  
287 would rightly face the issue of power deficiency.

288 The issue of reporting marginally significant effects is controversial (e.g., Pritschet et al., 2016). Should  
289 one not report a cluster simply because it cannot pass the rigorous statistical thresholding through FWE/FDR  
290 control at the present group size? We argue that, even if a cluster fails to survive rigorous correction, it does  
291 not necessarily mean that the results are not worth reporting, because they may be suggestive and provide some  
292 benchmark for future confirmation. Statistical inference should not be a binary decision, and the inclusion of  
293 effect estimates allows for a consistent approach to avoid this and to achieve a balance between false positives  
294 and false negatives (Lieberman and Cunningham, 2009). Thus we propose a two-tier approach to reporting  
295 clusters. In addition to the conventional FWE control, we believe that, if the individual voxels within a region  
296 achieve a basic significance level (e.g.,  $p \leq 0.05$ ) and if the cluster possesses some practically significant spatial  
297 extent, its reporting is warranted. Nevertheless, the reporting has to be combined with the corresponding effect  
298 estimate as well as a cautionary statement about the marginality. On the other hand, the activation of a cluster  
299 may become questionable with an unreasonable effect magnitude (e.g., 3.5% signal change) even if the cluster  
300 survives stringent statistical thresholding, and again, readers can only detect such suspicious results if the effect  
301 estimate is reported, providing a safeguard against potential false positives (Fig. 3).

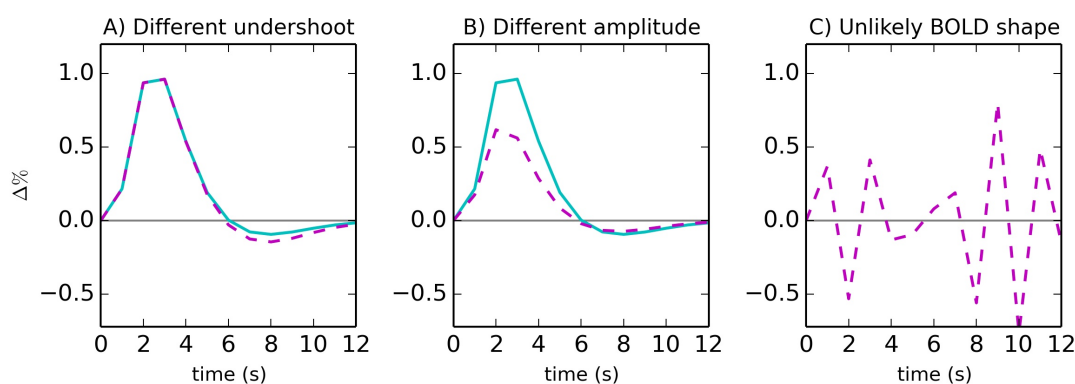

Figure 3: Modeling with multiple basis functions may provide more accurate characterization of the HDR as well as more powerful activation detection. For example, differences in shape features such as undershoot (A) and peak/recovery duration can be readily revealed in addition to peak (B). Furthermore, a false response curve, although statistically significant, would be identified (C) if its estimated shape dramatically differs from the signature shape of HDR.

### 302 Validation of BOLD response modeling through hemodynamic response curve

303 There are three common approaches to modeling the BOLD HDR. The first one presumes a fixed shape (or  
304 model-based) impulse response (IRF), such as the gamma variate in AFNI (Cohen, 1997) or the “canonical” IRF  
305 in SPM and FSL (Friston et al., 1998a). With this method, a single regression coefficient (or  $\beta$ ) associated with  
306 each condition in the individual subject analysis reflects the major HDR magnitude (e.g., percent signal change).  
307 The second approach makes no assumption about the IRF’s shape and estimates it with a set of basis functions,  
308 the number of which varies depending on the basis set and the duration over which the response is being modeled.  
309 For example, a common approach to this estimated-shape method consists of using a set of equally-spaced

310 TENT (piecewise linear) functions (linear splines), and each of the resulting regression coefficients represents  
311 an estimate of the response amplitude at some time after stimulus onset. This produces an ordered set of  
312 effect estimates for each modeled HDR. The third approach lies between the two extremes and uses a set of  
313 two or three basis functions (Friston et al., 1998b). In this adjusted-shape method, the first basis (canonical  
314 IRF) captures the major HDR shape, and the second basis (the time derivative of the canonical IRF) provides  
315 some flexibility in modeling the delay or time-to-peak. The third basis (resulting curve, which is the derivative  
316 relative to the dispersion parameter in the canonical IRF) allows the peak duration to vary. Here, as well,  
317 multiple effect estimates are associated with a single HDR.

318 With only a single parameter per condition, the fixed-shape approach is the most efficient and statistically  
319 powerful among the three, if the presumed shape is reasonably close to the ground truth. This technique is  
320 widely adopted because the corresponding group analysis is the easiest. With the adjusted-shape method, the  
321 common practice at the group level is to focus only on the first effect estimate, ignoring the shape information  
322 captured by the second and third coefficients. Group analysis using multiple basis functions has recently been  
323 extensively explored (Chen et al., 2015), and the HDR shape information in the sequence of effect estimates  
324 can be carried from the individual level over to the group level. The powerful validation aspect of this approach  
325 is that, even if a region is marginally significant, the investigator may argue for the existence of an effect with  
326 the presence of the signature shape of HDR curve, as well as for subtle response differences in the undershoot,  
327 recovery phase, etc. The graphical representation of HDR profiles (see Fig. 3) gives one a reassuring observation  
328 or an extra confidence about their reliability that could not be gained only through the conventional statistical  
329 safeguards (e.g., when a cluster fails to pass rigorous thresholding). With the availability of effect estimates at  
330 the multiple time points of the whole HDR, it would be hard to fully deny the suggestive value of reporting the  
331 cluster together with its effect sizes and HDR profiles.

## 332 **Meta analysis and power analysis**

333 As an integration approach, meta analysis in fMRI is usually performed to combine and summarize the  
334 results from various studies that are importantly not necessarily fully consistent with each other. There have  
335 been multiple methods developed for meta analysis. For example, the summarization may be based on voxel-  
336 wise results, a specific region (ROI), labels, coordinates, image, or activation likelihood estimation (Radua and  
337 Mataix-Cols, 2012). Most of the existing methods do not consider the effect estimates, in large part because  
338 such information is missing in the literature.

339 fMRI studies incorporate many factors that easily vary across sites, such as sample size (e.g., number of  
340 subjects and number of repetitions for each condition), specific task designs, scanners, etc.; and, as a result,  
341 both the magnitude of an effect and its reliability could be largely heterogeneous across reports. If the synthesis  
342 through meta analysis is solely based on coordinates or statistic value, the results could be unreliable. A recent  
343 study has shown that, when both effect estimates and their standard errors (which can be derived from the

344  $t$ -statistics) are available, meta analysis through a mixed- or random-effects model (Maumet and Nichols, 2016)  
345 would be more robust than other alternatives such as label- and coordinate-based approaches (e.g., coordinates  
346 only: activation likelihood estimation, Eickhoff et al. 2012; coordinates and Gaussianized  $Z$ -values: Radua  
347 and Mataix-Cols, 2009; Costafreda et al., 2009; Yarkoni et al., 2011). Furthermore, if those studies in which  
348 a region marginally survives (or even fails to survive) the FWE correction at the cluster level are included, an  
349 approach with both effect estimates and their stability information incorporated in the meta analysis would be  
350 more immune to publication bias.

351 The effect estimate is also a necessary quantity for power analysis. To design an experiment, the investigator  
352 may take information from previous studies and use power analysis to either 1) determine the sample size  
353 required to achieve a preset power (or false negative rate), or 2) assess the power of a given study (how likely  
354 one would detect a specific effect magnitude under a particular context). For both calculations, the statistic  
355 value as well as the effect estimate are needed as prior information. Even though mostly power analysis  
356 is currently performed with the peak value of  $t$ -statistic in the brain or a region (Durnez et al., 2016), the  
357 approach can be improved if the effect estimates are available in addition to statistic values. For example, the  
358 peak defined by the effect estimates within a cluster instead would be a more accurate representation than one  
359 by the  $t$ -statistic values. In addition, the availability of effect estimates would allow the investigator to perform  
360 conventional power analysis at the voxel, instead of region, level.

361 Looking forward, as the amount of public data and subsequent cross validations, meta and power analyses  
362 increases, it is vital to start providing results from more robust results for agglomerative approaches.

## 363 Recommendations and conclusion

364 Scientific investigations usually involve data collection from observational studies or meticulously-designed  
365 experiments. Raw data with no or little extraction and compression would clutter or even obscure the intended  
366 message from the investigator. On the other hand, overly summarized data or missing information would present  
367 less convincing conclusions, or, worse, lead to misleading impressions. Statistic values alone do not represent  
368 the whole scientific endeavor, and there is no reason to believe that neuroimaging should be an exception  
369 in which physical measurement is largely ignored. As a crucial part of scientific investigation, good statistical  
370 practice should reveal relevant quantitative components of data summarization including the amplitude of brain  
371 response in neuroimaging. Such numerical and graphical information would promote reproducibility and aid  
372 power and meta analysis. In addition, the effect estimate may either offer extra support to or counter the  
373 interpretation made from the statistical significance alone; either case leads to more accuracy, and therefore its  
374 inclusion should be reassuring to researchers.

375 As an antidote to  $p$ -hacking or the obsession with statistic values, complete rejection of  $p$ -values in scientific  
376 reporting would likely be an overreaction. We believe that it would be equally inappropriate to report only the  
377 effect estimate without the auxiliary information about its reliability in the form of standard error, confidence

378 interval, or statistic value. Both pieces of information are needed to see the whole picture. In addition to the  
379 response magnitude's serving as a benchmark, another benefit is that, if these multiple pieces of information  
380 were available in literature, one could identify those regions that showed substantial response magnitude but  
381 failed to achieve a significance level in the study due to large variability across subjects (such results are typically  
382 undisclosed.

383 Some effort has been devoted to promote the standardization of the reporting process in neuroimaging  
384 analysis (e.g., Poldrack et al., 2008; Carp, 2012; Nichols et al., 2016), though the important issue of reporting  
385 effect estimates has not been paid much attention. In this commentary, we have argued that reporting effect  
386 estimates has the same goal and benefit as standardization and that it is in fact necessary in order to improve  
387 results reporting in the field. In addition to revealing modeling specifics such as all explanatory variables, the  
388 number and directionality of post hoc tests, we strongly believe that effect estimates (e.g., in a scaled unit such  
389 as percent signal change) should be reported along with statistic values, instead of having excessive focus only  
390 on the latter in graphical representation. In addition, reporting the standardized effect (e.g., Cohen's  $d$ ) may  
391 be a valid alternative as well.

392 Regarding clusterization, we recommend that:

- 393 1) the statistic values be used for thresholding only (not for colorization, determining maxima of activity,  
394 etc.);
- 395 2) the activation patterns in brain images be colored by effect estimate values (e.g., percent signal  
396 change, correlation), not by statistic values; and
- 397 3) the full set of parameters (threshold value, degrees of freedom for each statistic test, cluster-wise  
398 probability, etc.) be explicitly stated.

399 Effect estimates should also be included in tabulated results at the regional level, with the peak defined as  
400 the maximum of the effect estimate, not of the statistic values. They can serve as another layer of supporting  
401 evidence in activation identification, and this becomes especially crucial when some practical constraints (e.g.,  
402 few subjects, suboptimal spatial cross-modality/subject alignment, small regions) lead to a situation in which  
403 a cluster fails to survive rigorous thresholding. Analytical toolboxes and software should facilitate, nurture, or  
404 even enforce a standardized process of generating proper and complete results reporting, thereby reducing the  
405 emphasis of  $p$ -values.

406 Our suggestions are aligned with and complementary to a proposal of avoiding misinterpretations through  
407 graphical representation of confidence intervals (Engel and Burton, 2013), as well as the guiding principles  
408 regarding reporting statistics in the recent ASA statement (see Introduction; Wasserstein and Lazar, 2016).  
409 Einstein noted that, "It can scarcely be denied that the supreme goal of all theory is to make the irreducible  
410 basic elements as simple and as few as possible without having to surrender the adequate representation of a  
411 single datum of experience" (Calaprice, 2010). Within the applied field of fMRI, this notion of making results

412 “as simple as possible *but not simpler*” should be taken to heart and adopted as well. We feel that this can be  
413 done only by including the full model reports of effect estimates and statistics in the literature.

## 414 Acknowledgments

415 The research and writing of the paper were supported by the NIMH and NINDS Intramural Research  
416 Programs (ZICMH002888) of the NIH/HHS, USA.

## 417 References

418 Abbott et al., 2016. Observation of gravitational waves from a binary black hole merger. *Phys. Rev. Lett.*  
419 116, 061102.

420 Baker, M., 2015. First results from psychology’s largest reproducibility test. *Nature*. DOI: 10.1038/nature.

421 Bohannon, J., 2016. About 40% of economics experiments fail replication survey. *Science*. DOI: 10.1126/sci-  
422 ence.aaf4141

423 Brett, M., Anton, J.-L., Valabregue, R., and Poline, J.-B., 2002. Region of interest analysis using an SPM  
424 toolbox, 8th International Conference on Functional Mapping of the Human Brain, Vol. 16.

425 Calaprice, A., 2010. *The Ultimate Quotable Einstein*, Page 475 and Page 384-385, Princeton University  
426 Press, Princeton, New Jersey.

427 Carp, J., 2012. The secret lives of experiments: Methods reporting in the fMRI. *NeuroImage* 63: 289-300

428 Carroll, L., 1893. *Sylvie and Bruno Concluded*. MacMillan and Co. and New York, London.

429 Chen, G., Saad, Z.S., Britton, J.C., Pine, D.S., Cox, R.W., 2013. Linear Mixed-Effects Modeling Approach  
430 to FMRI Group Analysis. *NeuroImage* 73:176-190.

431 Cox, R.W., 1996. AFNI: software for analysis and visualization of functional magnetic resonance neuroim-  
432 ages. *Comput. Biomed. Res.* 29:162-173. <http://afni.nimh.nih.gov>.

433 D’Esposito, Z.E., Aguirre, G.K., Rypma, B., 1999. The effect of normal aging on the coupling of neural  
434 activity to the bold hemodynamic response. *NeuroImage* 10:6-14.

435 Durnez, J., Degryse, J., Moerkerke, B., Seurinck, R., Sochat, V., Poldrack, R.A., Nichols, T.E., 2016. Power  
436 and sample size calculations for fMRI studies based on the prevalence of active peaks. <http://biorxiv.org/content/early/>

437 Eickhoff, S.B., Bzdok, D., Laird, A.R., Kurth, F., Fox, P.T., 2012. Activation likelihood estimation meta-  
438 analysis revisited. *NeuroImage* 59(3):2349-2361.

439 Einstein, A., 1915. *Die Feldgleichungen der Gravitation*. *Sitzungsberichte der Königlich Preußischen*  
440 *Akademie der Wissenschaften (Berlin)*, Seite 844-847.

441 Engel, S.A., Burton, P.C., 2013. Confidence intervals for FMRI activation maps. *PloS one* 8:e82419.

442 Gelman, A., Tuerlinckx, F., 2000. Type S error rates for classical and Bayesian single and multiple com-  
443 parison procedures. *Computational Statistics* 15, 373-390.



- 444 Gelman, A., Stern, H., 2006. The difference between significant and not significant is not Itself statistically  
445 significant. *The American Statistician* 60(4):328-331.
- 446 Gelman, A., and Weakliem, D., 2009. Of beauty, sex, and power: statistical challenges in 100 estimating  
447 small effects. *American Scientist* 97: 310-316.
- 448 Gelman, A., 2013. The problem with p-values is how they're used. *Ecology*. In press.
- 449 Gonzalez-Castillo, J., Saad, Z.S., Handwerker, D.A., Inati, S.J., Brenowitz, N., Bandettini, P.A., 2012.  
450 Whole-brain, time-locked activation with simple tasks revealed using massive averaging and model-free analysis.  
451 *PNAS* 109 (14), 5487-5492.
- 452 Gonzalez-Castillo, J., Chen, G., Nichols, T., Cox, R.W., 2016. Bandettini, P.A., Variance Decomposition  
453 for Single-Subject task-based fMRI activity estimates across many sessions. Under review.
- 454 Griffanti, L., Rolinski, M., Szewczyk-Krolikowski, K., Menke, R.A., Filippini, N., Zamboni, G., Jenkinson,  
455 M., Hu, M.T., Mackay, C.E., 2016. Challenges in the reproducibility of clinical studies with resting state fMRI:  
456 An example in early Parkinson's disease. *Neuroimage*. DOI: 10.1016/j.neuroimage.2015.09.021
- 457 Hasson, U., Nir Y., Levy, I., Fuhrmann, G., Malach, R., 2004. Intersubject synchronization of cortical  
458 activity during natural vision. *Science* 303:1634-1640.
- 459 Jo, H.J., Saad, Z.S., Simmons, W.K., Milbury, L.A., Cox, R.W., 2010. Mapping sources of correlation in  
460 resting state FMRI, with artifact detection and removal. *Neuroimage* 52(2):571-582.
- 461 Kramer, A.D.I, Guillory, J.E., Hancock, J.T., 2013. Experimental evidence of massive-scale emotional  
462 contagion through social networks. Vol. 111(24):8788-8790.
- 463 Lieberman, M.D., Cunningham, W.A., 2009. Type I and Type II error concerns in fMRI research: re-  
464 balancing the scale. *Soc Cogn Affect Neurosci*. 4(4): 423-428.
- 465 Maumet, C., Nichols, T.E., 2016. Minimal Data Needed for Valid and Accurate Image-Based fMRI Meta-  
466 Analysis. doi: <http://dx.doi.org/10.1101/048249>
- 467 Nichols, T.E., Das, S., Eickhoff, S.B., Evans, A.C., Glatard, T., Hanke, M., Kriegeskorte, N., Milham, M.P.,  
468 Poldrack, R.A., Poline, J.B., Proal, E., Thirion, B., Van Essen, D.C., White, T., Yeo, B.T.T., 2016. Best  
469 Practices in Data Analysis and Sharing in Neuroimaging using MRI.
- 470 Nuzzo, R., 2014. Scientific method: Statistical errors. *Nature* 506, 150-152. doi:10.1038/506150a
- 471 Poldrack, R.A., Fletcher, P.C., Henson, R.N., Worsley, K.J., Brett, M., Nichols, T.E., 2008. Guidelines for  
472 reporting an fMRI study. *NeuroImage* 40: 409-414.
- 473 Popper, K., 1963. *Conjectures and Refutations: The Growth of Scientific Knowledge*. London: Routledge.
- 474 Pritschet L., Powell, D., Horne, Z., 2016. Marginally significant effects as evidence for hypotheses: changing  
475 attitudes over four decades. *Psychological Science* 1-7. doi: 10.1177/0956797616645672
- 476 Radua, J, Mataix-Cols, D., 2012. Meta-analytic methods for neuroimaging data explained. *Biol Mood*  
477 *Anxiety Disord*. 2:6. doi: 10.1186/2045-5380-2-6
- 478 Sullivan, G.M., Feinn, R., 2012. Using effect size - or why the P value is not enough. *Journal of Graduate*

479 Medical Education. 4(3): 279-282.

480 Thompson, B., 1999. Common methodology mistakes in educational research, revisited, along with a  
481 primer on both effect sizes and the bootstrap. Invited address presented at the annual meeting of the American  
482 Educational Research Association, Montreal. (ERIC Document Reproduction Service No. ED 429 110)

483 Trafimow, D., 2014. Editorial. Basic Appl. Soc. Psych. 36(1):1-2.

484 Wasserstein, R.L., Lazar, N.A., 2016. The ASA's Statement on *p*-Values: Context, Process, and Purpose.  
485 The American Statistician 70:2, 129-133. DOI: 10.1080/00031305.2016.1154108

486 Wilkinson, L., and APA Task Force on Statistical Inference, 1999. Statistical Methods in Psychology  
487 Journals: Guidelines and Explanations. American Psychologist 54(8): 594-604.

488 Yarkoni, T., Poldrack, R.A., Nichols, T.E., Van Essen, D.C., Wager, T.D., 2011. Large-scale automated  
489 synthesis of human functional neuroimaging data. Nature Methods 8:665-670.

490 Ziliak, S.T., McCloskey, D.N., 2009. The cult of statistical significance. JSM, Section on Statistical Educa-  
491 tion: 2302-2319. <http://www.deirdremccloskey.com/docs/jsm.pdf>
